# Supplementary material
Source: PubMed Central journal article supplement (PMC4433538)

## Electronic supplementary material

**ESM Fig. 2** LD ( $r^2$  and  $D'$ ) structure of the region near the *IRS1* gene. We used Haploview 4.1 software to generate the LD plot of the region near the *IRS1* gene, where the SNPs of rs1522813 and rs2943641 are located. The two SNPs of rs1522813 and rs2943641 are in two independent LD blocks. The colour from light red to deep red represents the strength of LD

**a**

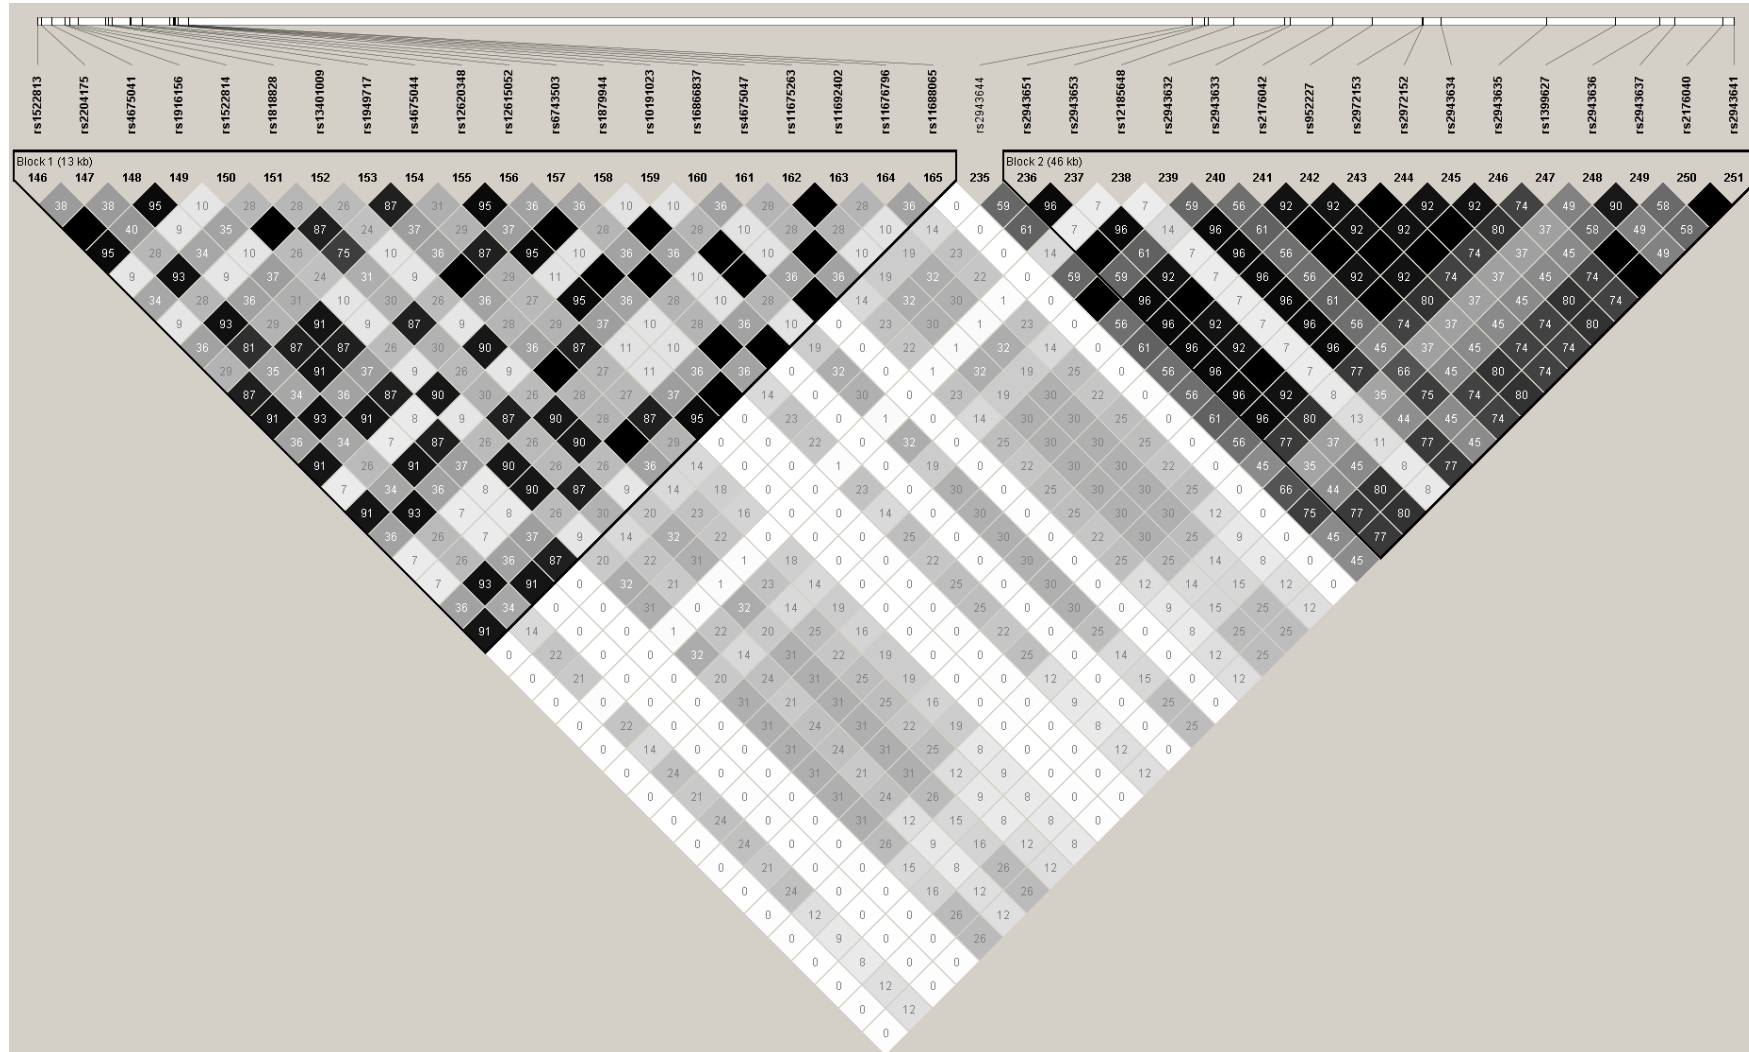

b

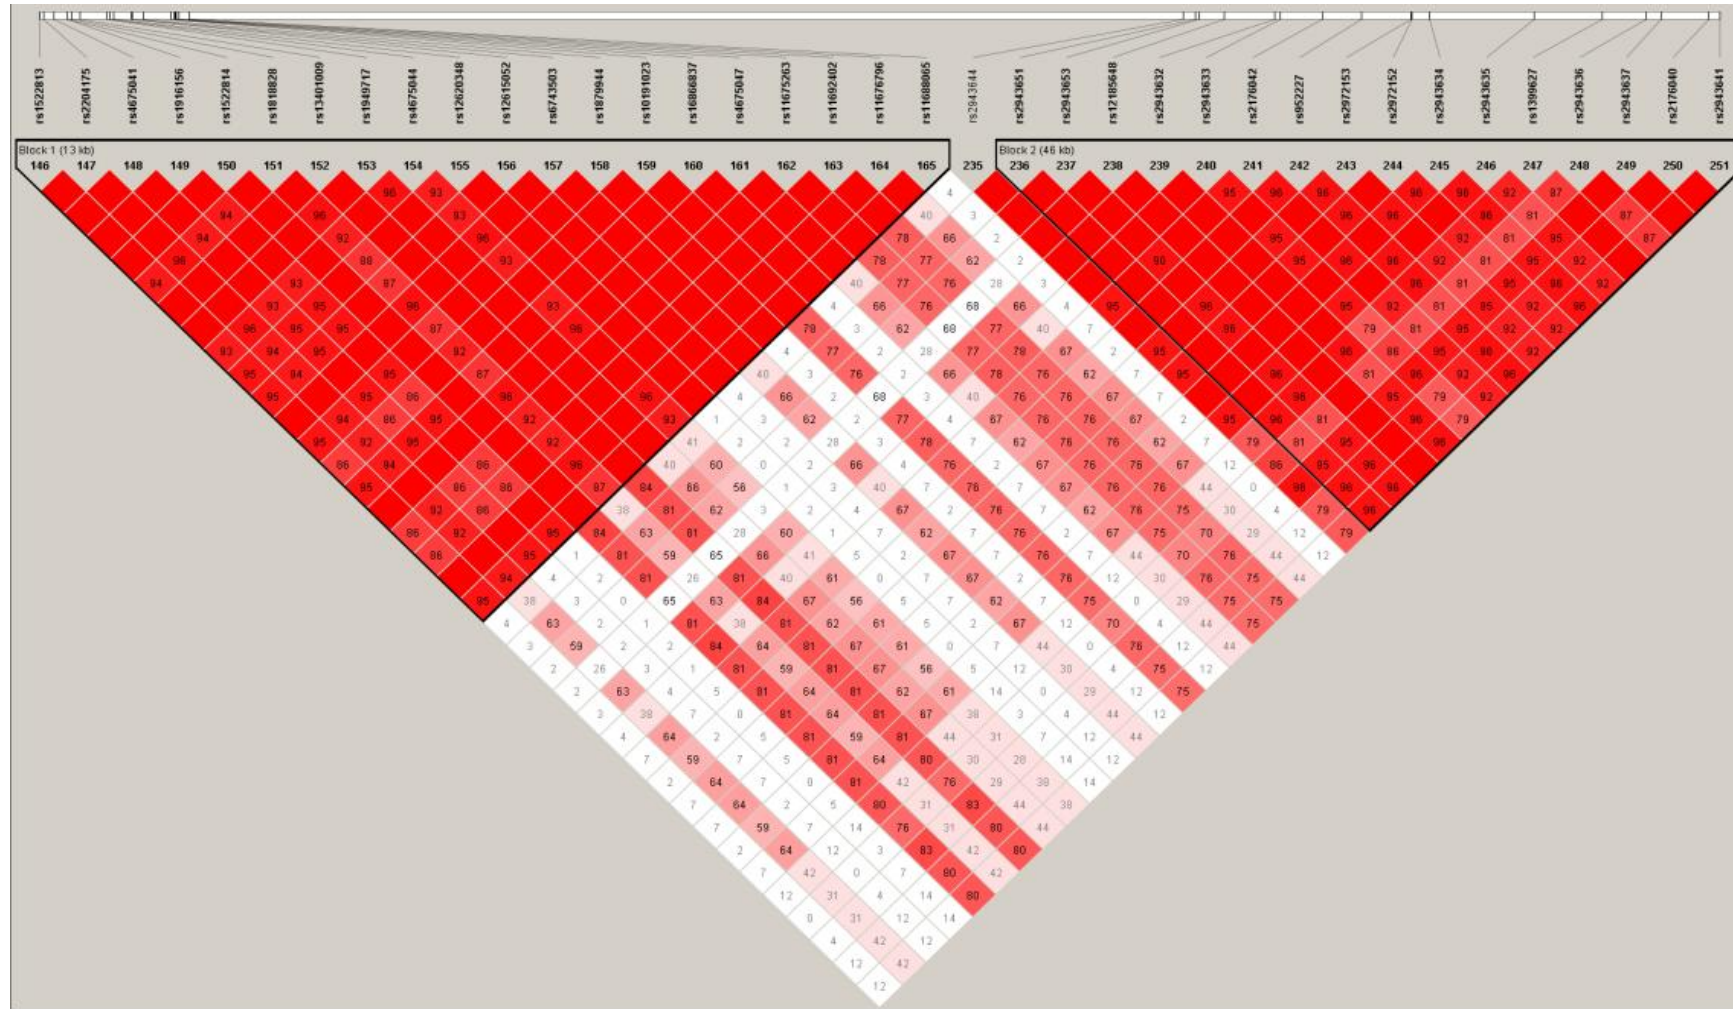

Supplement: NIHMS462642-supplement-suppl_fig_2.pdf [file NIHMS462642-supplement-suppl_fig_2.pdf]
