# Supplementary material
Source: PubMed Central journal article supplement (PMC4433538)
Supplement: NIHMS462642-supplement-suppl_Table_1.pdf [file NIHMS462642-supplement-suppl_Table_1.pdf]

## Electronic supplementary material

**ESM Table 1** Risk factor characteristics of cases and controls at baseline in NHS and HPFS<sup>a</sup>

| Variable                        | NHS (women)        |                       |                             | HPFS (men)         |                       |                             |
|---------------------------------|--------------------|-----------------------|-----------------------------|--------------------|-----------------------|-----------------------------|
|                                 | Cases<br>(n=1,467) | Controls<br>(n=1,754) | <i>p</i> value <sup>b</sup> | Cases<br>(n=1,124) | Controls<br>(n=1,298) | <i>p</i> value <sup>b</sup> |
| Age (years)                     | 43.5±6.7           | 43.1±6.8              | 0.07                        | 55±8.6             | 55±8.4                | 0.65                        |
| BMI (kg/m <sup>2</sup> )        | 27.4±5.0           | 23.5±3.9              | <0.0001                     | 27.8±4.0           | 25.0±2.7              | <0.0001                     |
| Family history of diabetes (%)  | 49.5               | 22.1                  | <0.0001                     | 33.4               | 13.6                  | <0.0001                     |
| Current smoking (%)             | 29.4               | 20.9                  | <0.0001                     | 12.1               | 7.6                   | <0.0001                     |
| Alcohol intake (g/day)          | 4.4±9.1            | 6.6±10.0              | <0.0001                     | 11.2±16.2          | 12.1±15.9             | 0.19                        |
| Physical activity <sup>c</sup>  | 3.7±2.8            | 4.1±2.9               | 0.0005                      | 14.6±19.0          | 21.1±25.2             | <0.0001                     |
| Current PMH users (%)           | 29.2               | 28.9                  | 0.90                        | –                  | –                     | –                           |
| Postmenopausal (%)              | 35.7               | 30.6                  | 0.002                       | –                  | –                     | –                           |
| P:S ratio                       | 0.34±0.12          | 0.35±0.14             | 0.26                        | 0.55±0.19          | 0.58±0.21             | 0.004                       |
| <i>trans</i> fat intake (g/day) | 4.1±1.3            | 4.0±1.3               | 0.11                        | 2.9±1.0            | 2.8±1.1               | 0.15                        |
| Cereal fibre intake (g/day)     | 2.5±1.5            | 2.6±1.6               | 0.05                        | 5.6±3.3            | 6.3±4.8               | 0.0001                      |
| Total energy intake (kJ/day)    | 6,740±2,176        | 6,577±2,041           | 0.04                        | 8,786±2,728        | 8,715±2,590           | 0.49                        |
| Total energy intake (kcal/day)  | 1,611±520          | 1,572±488             | 0.04                        | 2,100±652          | 2,083±619             | 0.49                        |

<sup>a</sup>Values are means±SD unless otherwise indicated

<sup>b</sup>Test of differences between cases and controls:  $\chi^2$  test for categorical and *t* test for continuous variables

<sup>c</sup>Metabolic equivalent task h/week for men in HPFS and h/week for women in NHS

PMH, post-menopausal hormone; P:S, polyunsaturated fatty acids:saturated fatty acids
