# Supplementary material
Source: PubMed Central journal article supplement (PMC4433538)
Supplement: NIHMS462642-supplement-supple_fig_1.pdf [file NIHMS462642-supplement-supple_fig_1.pdf]

## Electronic supplementary material

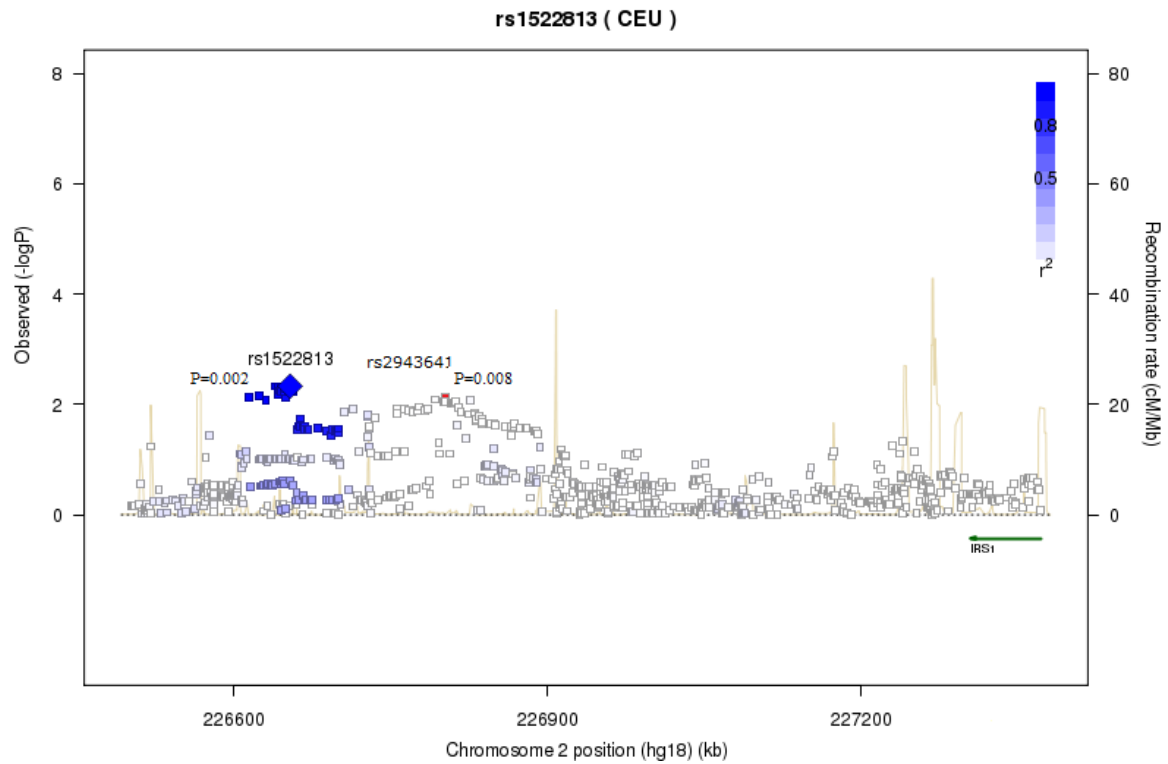

**ESM Fig. 1** Meta-analysis of SNPs near to *IRS1* with type 2 diabetes in NHS and HPFS. Association signals in and adjacent to *IRS1* gene region on chromosome 2. The vertical axis represents the  $-\log_{10} p$  values. Recombination rates in this region were plotted in the background in light blue. Pairwise LDs between rs1522813 and other SNPs were estimated using HapMap LD data. The colour from light blue to deep blue represents the strength of LD
